# Supplementary material for: Efficient removal of organic dyestuff in water contamination over a MOF-derived Co-based adsorbent
Source: Royal Society of Chemistry journal article supplement (doi:10.1039/d3re00126a), 2023-01-01
Supplement: d3re00126a1.pdf [file d3re00126a1.pdf]

## Supporting information

### Efficient removal of organic dyestuff in water contamination over MOF-derived Co-based adsorbent

Yuxi Yang<sup>a†</sup>, Yaqi Xue<sup>a†</sup>, Jing Li<sup>b</sup>, Haihong Xia<sup>b</sup>, Minghao Zhou<sup>a\*</sup>

*a. School of Chemistry and Chemical Engineering, Yangzhou University,  
Yangzhou 225002, China*

*b. Institute of Chemical Industry of Forest Products, Chinese Academy of  
Forestry, Nanjing 210042, China*

E-mail: [zhouminghao@yzu.edu.cn](mailto:zhouminghao@yzu.edu.cn) (Minghao Zhou)

†These authors contributed equally: Yaqi Xue and Yuxi Yang.

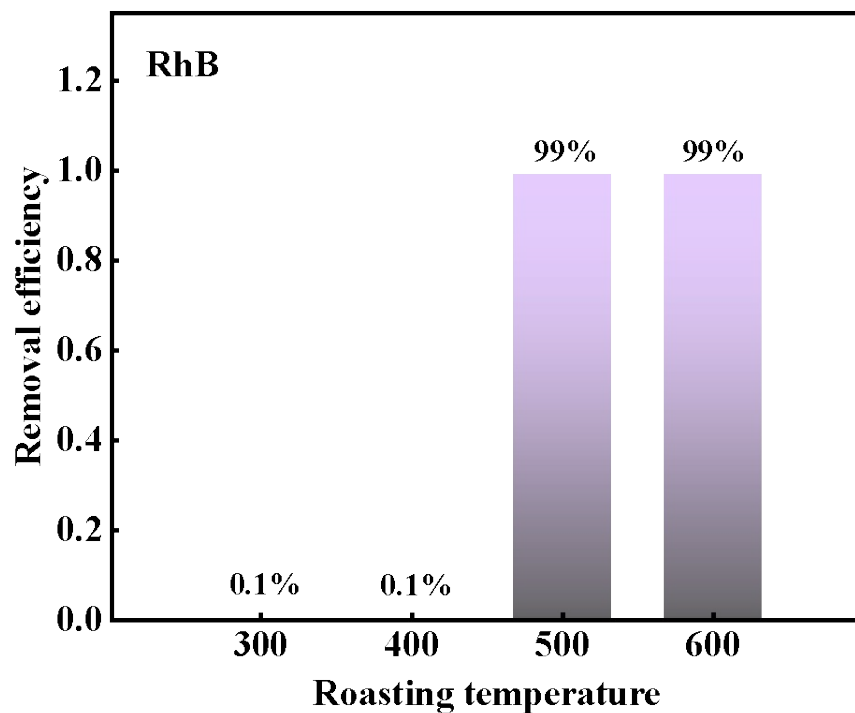

**Fig. S1.** The time-dependent removal efficiency of RhB aqueous solution (125 mg/L) over  $\text{Co}_{0.5}(\text{PTA})@\text{C}$  catalysts at different roasting temperatures (300 °C, 400 °C, 500 °C, and 600 °C). (Reaction condition: 30 mg adsorbent, 60 mL dye solution, 60 minutes.)

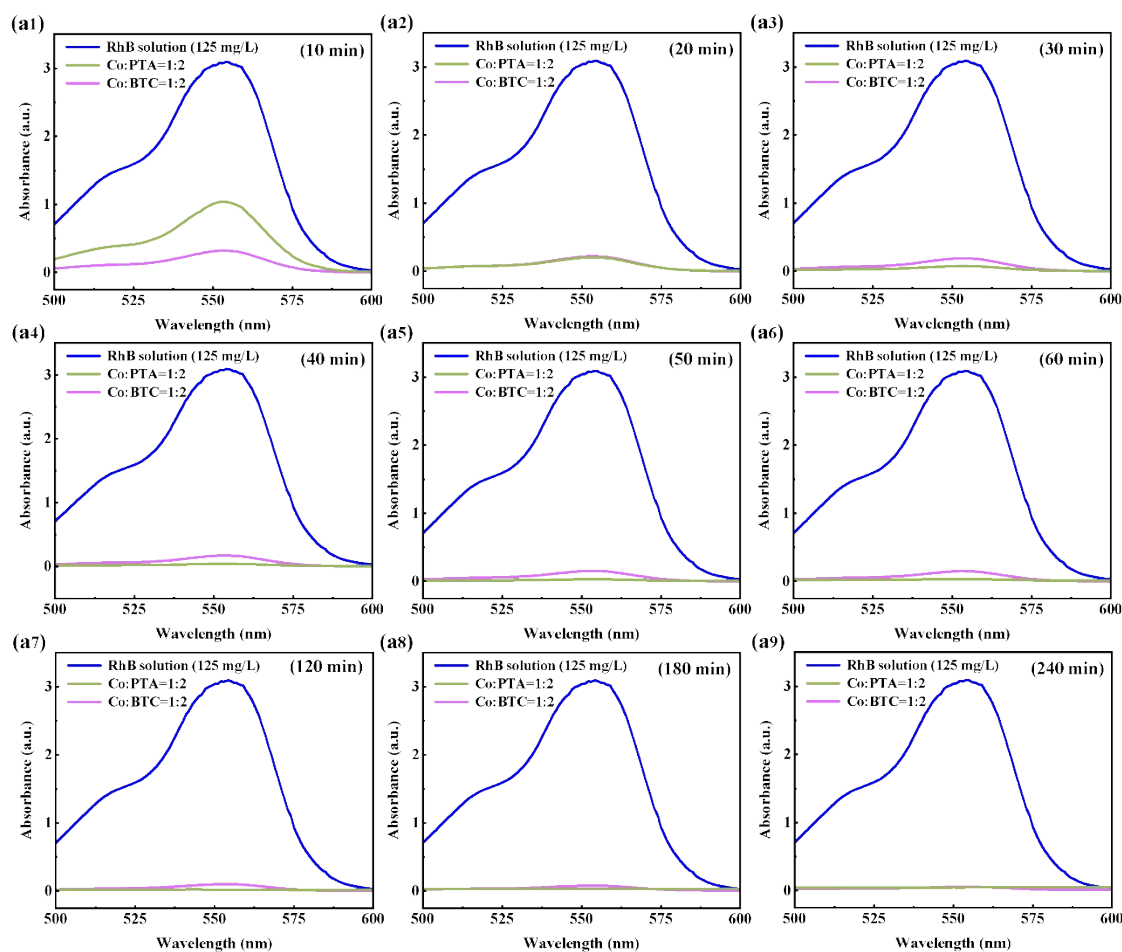

**Fig. S2.** The adsorption of RhB aqueous solution (125 mg/L) over  $\text{Co}_{0.5}(\text{BTC})@\text{C}$  and  $\text{Co}_{0.5}(\text{PTA})@\text{C}$  catalysts with the best ratio (1:2) (a1-a9) Visible light absorption spectra (10-360 min).

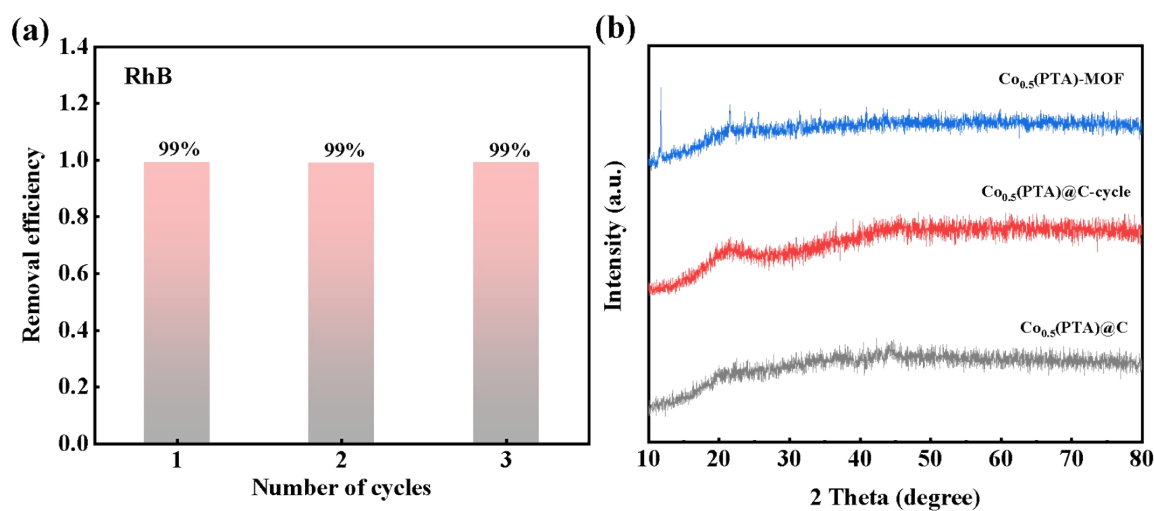

**Fig. S3.** (a) Removal efficiency of cycled  $\text{Co}_{0.5}(\text{PTA})@\text{C}$  samples. (b) XRD spectra of  $\text{Co}_{0.5}(\text{PTA})@\text{C}$ ,  $\text{Co}_{0.5}(\text{PTA})@\text{C}$ -cycle and  $\text{Co}_{0.5}(\text{PTA})\text{-MOF}$  samples.

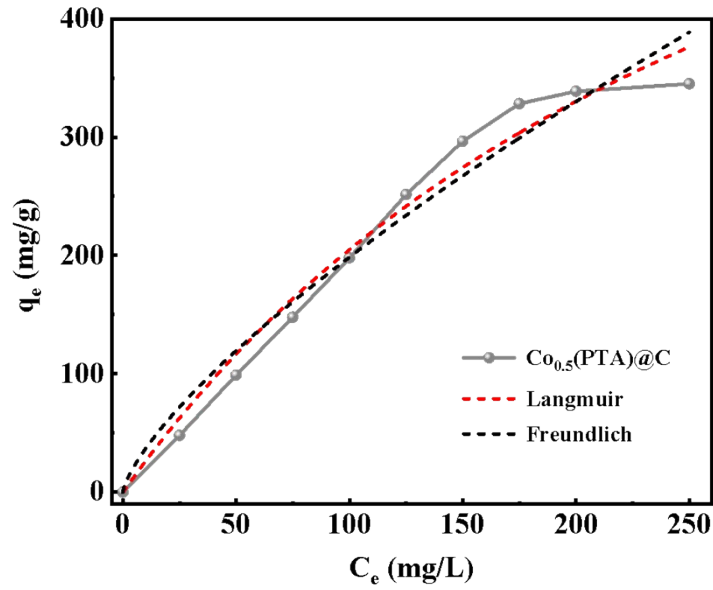

**Fig. S4.** The Langmuir and Freundlich adsorption isotherms of RhB over  $\text{Co}_{0.5}(\text{PTA})@\text{C}$  (solid and broken lines present the experimental curve and the simulated values, respectively).

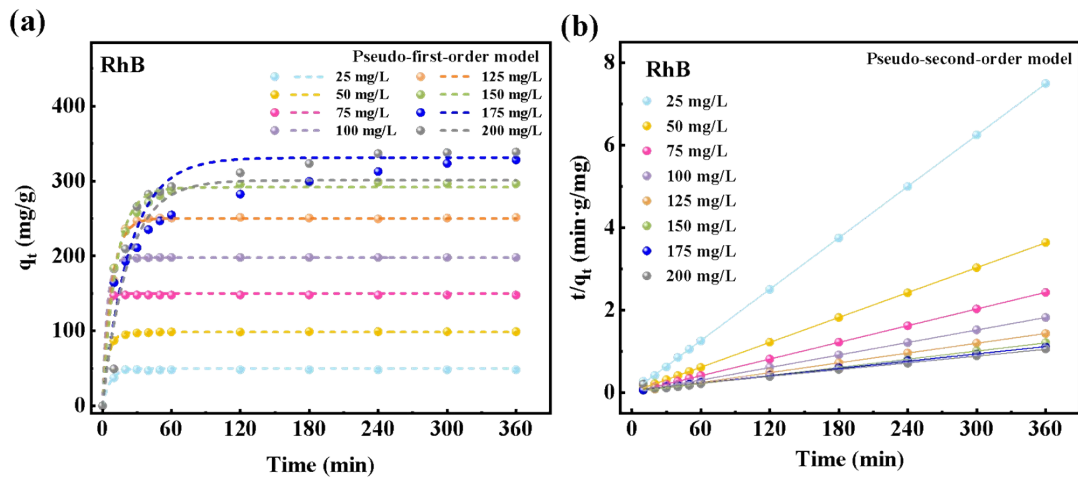

**Fig. S5.** Nonlinear kinetic curves fitted to the pseudo-first-order and pseudo-second-order models of RhB.

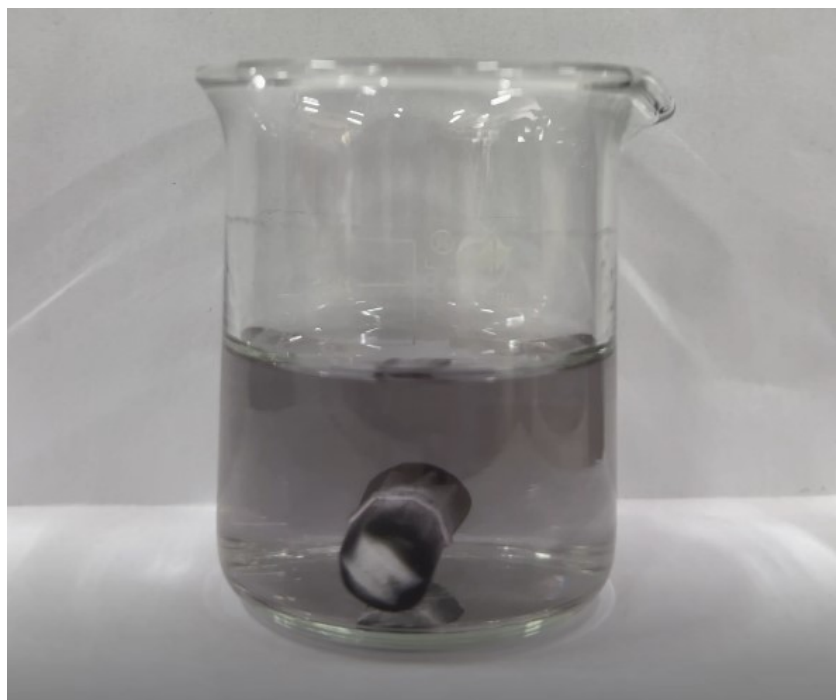

**Fig. S6.** Magnetism of MOF-derived metal-based catalysts.

**Table S1.** The adsorption of different initial concentrations from 25 mg/L to 200 mg/L (RhB aqueous solution) over Co<sub>0.5</sub>(PTA)@C catalysts. (Reaction condition: 30 mg adsorbent, 60 mL dye solution, 500 rpm, 360 minutes.)

| C <sub>0</sub> | A    | q <sub>t</sub> (mg/g) |        |        |        | removal efficiency |      |      |      |
|----------------|------|-----------------------|--------|--------|--------|--------------------|------|------|------|
|                |      | 60                    | 120    | 180    | 240    | 60                 | 120  | 180  | 240  |
|                |      | min                   | min    | min    | min    | min                | min  | min  | min  |
| 25             | 0.02 | 98.67                 | 47.97  | 47.97  | 47.97  | 0.97               | 0.99 | 0.99 | 0.99 |
| 50             | 0.01 | 98.67                 | 98.40  | 98.99  | 98.99  | 0.99               | 0.99 | 0.99 | 0.99 |
| 75             | 0.01 | 147.87                | 147.87 | 147.87 | 147.87 | 0.99               | 0.99 | 0.99 | 0.99 |
| 100            | 0.01 | 197.96                | 197.96 | 197.96 | 197.96 | 0.99               | 0.99 | 0.99 | 0.99 |
| 125            | 0.15 | 286.36                | 295.72 | 298.03 | 298.53 | 0.95               | 0.98 | 0.99 | 0.99 |
| 150            | 0.44 | 250.55                | 251.48 | 250.58 | 249.50 | 0.99               | 0.99 | 0.99 | 0.98 |
| 175            | 0.85 | 254.72                | 282.44 | 299.54 | 312.77 | 0.74               | 0.82 | 0.87 | 0.91 |
| 200            | 0.87 | 292.50                | 310.84 | 323.31 | 336.73 | 0.73               | 0.78 | 0.81 | 0.84 |

C<sub>0</sub> (mg/L) – the initial concentrations.

A – the absorbance (RhB, λ<sub>max</sub> = 554 nm).

q<sub>t</sub> (mg/g) - the time-dependent adsorption capacities.

**Table S2.** The correlation parameters and coefficients of Langmuir and Freundlich for RhB adsorptions over Co<sub>0.5</sub>(PTA)@C.

| Isotherm models | parameters/coefficients                        | RhB                     |
|-----------------|------------------------------------------------|-------------------------|
| Langmuir        | q <sub>m</sub> (mg/g)                          | 8.49 × 10 <sup>3</sup>  |
|                 | K <sub>L</sub> (dm <sup>3</sup> /mg)           | 3.18 × 10 <sup>-3</sup> |
|                 | R <sup>2</sup>                                 | 9.79 × 10 <sup>-1</sup> |
|                 | Reduced Chi-Sqr                                | 3.83 × 10 <sup>2</sup>  |
| Freundlich      | K <sub>F</sub> ((mg/g) (L/mg) <sup>1/n</sup> ) | 6.80                    |
|                 | n                                              | 1.37                    |
|                 | R <sup>2</sup>                                 | 0.96                    |
|                 | Reduced Chi-Sqr                                | 6.44 × 10 <sup>2</sup>  |

K<sub>L</sub> - the Langmuir constant, which is defined as the ratio of the adsorption rate constant to the desorption rate constant.

K<sub>F</sub> - the Freundlich constant, which is related to adsorption capacity and adsorption strength under the Freundlich model.

**Table S3.** The correlation parameters and coefficients of the pseudo-first-order and pseudo-

second-order kinetic models for RhB adsorptions over Co<sub>0.5</sub>(PTA)@C.

| C <sub>0</sub><br>(mg/L) | q <sub>e,exp</sub><br>(mg/g) | Pseudo-first-order kinetic             |                             |                               | Pseudo-second-order kinetic            |                             |                               |
|--------------------------|------------------------------|----------------------------------------|-----------------------------|-------------------------------|----------------------------------------|-----------------------------|-------------------------------|
|                          |                              | k <sub>1</sub><br>(min <sup>-1</sup> ) | R <sub>1</sub> <sup>2</sup> | q <sub>e1,cal</sub><br>(mg/g) | k <sub>2</sub><br>(min <sup>-1</sup> ) | R <sub>2</sub> <sup>2</sup> | q <sub>e2,cal</sub><br>(mg/g) |
| 25                       | 47.97                        | 1.50×10 <sup>-1</sup>                  | 9.79×10 <sup>-1</sup>       | 50.00                         | 1.16×10 <sup>-2</sup>                  | 9.99×10 <sup>-1</sup>       | 48.12                         |
| 50                       | 98.99                        | 2.11×10 <sup>-1</sup>                  | 9.99×10 <sup>-1</sup>       | 98.32                         | 1.11×10 <sup>-2</sup>                  | 9.99×10 <sup>-1</sup>       | 99.31                         |
| 75                       | 147.87                       | 3.50×10 <sup>-1</sup>                  | 9.98×10 <sup>-1</sup>       | 150.00                        | 6.75×10 <sup>-3</sup>                  | 9.99×10 <sup>-1</sup>       | 148.15                        |
| 100                      | 197.96                       | 2.56×10 <sup>-1</sup>                  | 9.99×10 <sup>-1</sup>       | 197.66                        | 1.47×10 <sup>-2</sup>                  | 9.99×10 <sup>-1</sup>       | 197.63                        |
| 125                      | 251.55                       | 1.25×10 <sup>-1</sup>                  | 9.97×10 <sup>-1</sup>       | 250.00                        | 3.25×10 <sup>-3</sup>                  | 9.99×10 <sup>-1</sup>       | 251.89                        |
| 150                      | 296.51                       | 8.56×10 <sup>-2</sup>                  | 9.91×10 <sup>-1</sup>       | 291.65                        | 6.56×10 <sup>-4</sup>                  | 9.99×10 <sup>-1</sup>       | 303.03                        |
| 175                      | 328.31                       | 4.56×10 <sup>-2</sup>                  | 9.29×10 <sup>-1</sup>       | 300.96                        | 1.68×10 <sup>-4</sup>                  | 9.99×10 <sup>-1</sup>       | 338.98                        |
| 200                      | 338.73                       | 4.20×10 <sup>-1</sup>                  | 9.56×10 <sup>-1</sup>       | 331.17                        | 1.25×10 <sup>-4</sup>                  | 9.99×10 <sup>-1</sup>       | 363.64                        |

**Table S4.** The detailed data on BET surface area, pore size, and the Co content of M@C catalysts.

| Samples                          | The content of Co <sup>a</sup> (At. %) |
|----------------------------------|----------------------------------------|
| Co <sub>0.5</sub> (PTA)@C        | 1.10                                   |
| Co <sub>0.5</sub> (PTA)@C-cycled | 1.04                                   |

a - detected by ICP.
